# Supplementary material
Source: ML conference proceedings conference paper supplement (https://aclanthology.org/2020.findings-emnlp.370)
Supplement: OptionalSupplementaryMaterial [file 2020.findings-emnlp.370.OptionalSupplementaryMaterial.zip]

## A Appendices: Hyperparameters

| Hyperparams         | BERT |            | RoBERTa |            |
|---------------------|------|------------|---------|------------|
|                     | MRC  | Reflection | MRC     | Reflection |
| Dropout             |      | 0.1        |         | 0.1        |
| Attention dropout   |      | 0.1        |         | 0.1        |
| Max sequence length |      | 512        |         | 512        |
| Learning Rate       | 3e-5 | 5e-6       | 2.2e-5  | 5e-6       |
| Batch Size          |      | 24         |         | 48         |
| Weight Decay        |      | 0.01       |         | 0.01       |
| Epochs              | 1    | 2          | 1       | 2          |
| Learning Rate Decay |      | Linear     |         | Linear     |
| Warmup ratio        |      | 0.1        |         | 0.06       |
| Gradient Clipping   |      | 1.0        |         | -          |
| Adam $\epsilon$     |      | 1e-8       |         | 1e-8       |
| Adam $\beta_1$      |      | 0.9        |         | 0.9        |
| Adam $\beta_2$      |      | 0.999      |         | 0.999      |

Table 1: Training hyperparameters of MRC model and Reflection model.
